# Supplementary material for: OTULIN protects the liver against cell death, inflammation, fibrosis, and cancer
Source: PubMed Central journal article supplement (PMC7206033; doi:10.1038/s41418-020-0532-1), 2020-03-30
Supplement: 41418_2020_532_MOESM8_ESM.pdf [file 41418_2020_532_MOESM8_ESM.pdf]

# **OTULIN protects the liver against cell death, inflammation, fibrosis, and cancer**

Rune Busk Damgaard<sup>1,\*</sup>, Helen E. Jolin<sup>1</sup>, Michael E.D. Allison<sup>2</sup>, Susan E. Davies<sup>3</sup>,  
Hannah L. Titheradge, Andrew N.J. McKenzie<sup>1,6</sup>, David Komander<sup>1,4,5,6,7,\*</sup>

## **SUPPLEMENTARY INFORMATION**

**Supplementary Figures S1-7**

**Supplementary Figure Legends**

**Supplementary Table S1 (antibodies)**

**Supplementary Table S2 (primer sequences)**

## Supplemental Information: Legends

### Figure S1. Analysis of Control<sup>Chim</sup> and *Otulin*-KO<sup>Chim</sup> mice. Related to Figure 1.

(A) Micrographs of H&E stained tissue sections from Control<sup>Chim</sup> and *Otulin*-KO<sup>Chim</sup> mice at the end of the experiment shown in Figure 1B. Micrographs are representative of two mice in each group.

(B) Uncropped Ponceau S stained membrane from Figure 1G.

(C) Percentage of parental (CD45.2+) cells in the spleens of Control<sup>Chim</sup> and *Otulin*-KO<sup>Chim</sup> at the end of the experiment shown in Figure 1B.

(D) Representative dot plot from flow cytometric analysis of parental (CD45.2+) and B6.SLJ (CD45.1+) splenocytes used to generate the plot in (C).

**Figure S2. Generation and analysis of mice with hepatocyte-specific deletion of *Otulin* (*Otulin*<sup>Δhep</sup> mice). Related to Figure 2.**

**(A)** Schematic showing the strategy used to generate mice with hepatocyte-specific deletion of *Otulin*. Numbers denote *Otulin* exons.

**(B)** Uncropped Ponceau S stained membrane from Figure 2B.

**(C)** Uncropped Ponceau S stained membrane from Figure 2C.

**(D)** Immunohistochemical analysis of OTULIN expression in *Otulin*<sup>Δhep</sup> and control mice at the age of 8-10 weeks shows clonal areas of hepatocytes that retain OTULIN protein expression (asterisk), likely due to incomplete penetrance and recombination efficiency of the *Alb-Cre* transgene. Micrographs are representative of two mice of each genotype.

**(E)** Micrographs of H&E stained liver sections from *Otulin*<sup>Δhep</sup> and control mice at the age of 8-10 weeks show histological features present in the diseased livers of *Otulin*<sup>Δhep</sup> mice. Black arrowhead indicates inflammatory focus. Blue arrowheads indicate Mallory-Denk bodies. LCC, large cell change. Micrographs are representative of six mice of each genotype.

**(F)** Micrographs of H&E stained liver sections from *Otulin*<sup>Δhep</sup> and control mice at the age of 8-10 weeks show formation of pre-malignant tumours (dysplastic nodules) in *Otulin*<sup>Δhep</sup> livers. Micrographs are representative of six mice of each genotype. Tu, tumour. NT, non-tumour.

**(G)** High magnification micrographs of PSR stained liver sections (shown in Figure 2E) from *Otulin*<sup>Δhep</sup> and control mice aged 8-10 weeks showing pericellular collagen deposition.

**(H)** Relative liver weights from *Otulin*<sup>Δhep</sup> (n=6) and control mice (n=6) at the age of 8-10 weeks. Each data point represents one mouse. Red bars indicate means. Data were analysed using the unpaired, two-sided Student's *t* test. n.s., non-significant.

**(I)** Quantification of nuclear diameter of hepatocytes from *Otulin*<sup>Δhep</sup> and control mice at the age of 8-10 weeks. Two fields of view were quantified from each of six *Otulin*<sup>Δhep</sup> mice and six control mice. Each data point represents one mouse. Red bars indicate means. Data were analysed using an unpaired, two-sided Student's *t* test. n.s., non-significant.

**(J)** Representative staggered histograms from flow cytometric analysis of DNA content in nuclei isolated from *Otulin*<sup>Δhep</sup> and control mice at the age of 8-10 weeks showing increased proportions of nuclei with DNA content  $\geq 8n$ .

**(K)** Quantification of flow cytometric analysis as shown in (I). Data represent mean +SEM. Data were analysed using the unpaired, two-sided Student's *t* test.

**(L)** Gating strategy on a representative liver sample for flow cytometric analysis as shown in (I-J).

**Figure S3. Analysis of liver disease in *Otulin*<sup>Δhep</sup> mice. Related to Figure 3.**

**(A)** Uncropped Ponceau S stained membrane from Figure 3F.

**(B)** Uncropped Ponceau S stained membrane from Figure 3H.

**Figure S4. Analysis of hepatocellular carcinoma in *Otulin*<sup>Δhep</sup> mice. Related to Figure 4.**

**(A)** Representative macroscopic appearance of *Otulin*<sup>Δhep</sup> livers at the age of 50-54 weeks. Arrowheads indicate highly vascularised tumours. Scale bars indicate 1 cm.

**(B)** Micrographs of H&E stained tumours from *Otulin*<sup>Δhep</sup> mice aged 50-54 weeks. nec, necrotic area. cys, cystic lesion.

**(C)** Representative macroscopic appearance of *Otulin*<sup>Δhep</sup> and control livers at the age of 32 weeks. Scale bars indicate 1 cm.

**(D)** Micrographs of H&E (top panels) and PSR (bottom panels) stained liver sections from *Otulin*<sup>Δhep</sup> (n=5) and control mice (n=8) at the age of 32 weeks. Arrowheads indicate areas of poor tumour demarcation. Tu, tumour. NT, non-tumour.

**Figure S5. Analysis of OTULIN and TNFR1 double-deficient livers. Related to Figure 5.**

**(A)** PCR genotyping of *Otulin*<sup>Δhep</sup> mice, *Otulin*<sup>Δhep</sup>;*Tnfr1*<sup>-/-</sup>, and their respective controls show co-deletion of *Otulin* and *Tnfr1* as expected. kb, kilobases.

**(B)** Micrographs of H&E stained liver sections from *Otulin*<sup>Δhep</sup> mice, *Otulin*<sup>Δhep</sup>;*Tnfr1*<sup>-/-</sup> mice, and their respective controls at the age of 8-12 weeks showing no difference in histopathological changes between *Otulin*<sup>Δhep</sup> mice and *Otulin*<sup>Δhep</sup>;*Tnfr1*<sup>-/-</sup> mice.

**(C)** Immunoblot analysis of caspase-3 cleavage and NF-κB (p65) activation in whole-liver lysates from *Otulin*<sup>Δhep</sup> mice, *Otulin*<sup>Δhep</sup>;*Tnfr1*<sup>-/-</sup>, and their respective controls (n=3 in each group) at the age of 8-12 weeks.

**(D)** Representative macroscopic appearance of livers from *Otulin*<sup>Δhep</sup> mice, *Otulin*<sup>Δhep</sup>;*Tnfr1*<sup>-/-</sup> mice, and their respective controls at the age of 20-25 weeks. Scale bar indicates 1 cm.

**Figure S6. Analysis of neonatal *Otulin*<sup>Δhep</sup> and control mice. Related to Figure 6.**

**(A)** Immunoblot analysis of OTULIN, HOIP, and caspase-3 in whole-liver lysates from three *Otulin*<sup>Δhep</sup> and three control mice aged 3 days.

**(B)** Uncropped Ponceau S stained membrane from Figure S6A.

**(C)** Immunoblot analysis of OTULIN, HOIP, and caspase-3 in whole-liver lysates from three *Otulin*<sup>Δhep</sup> and three control mice aged 9 days.

**(D)** Uncropped Ponceau S stained membrane from Figures S6C and 6H.

**(E)** Micrographs of H&E stained liver sections from *Otulin*<sup>Δhep</sup> and control mice at the age of 3 days (P3).

**(F)** Analysis of triglyceride and glucose levels in serum from terminal bleeds of *Otulin*<sup>Δhep</sup> (n=9) and control (n=6) mice at the age of 9 days.

**(G-H)** Micrographs of PSR stained liver sections from *Otulin*<sup>Δhep</sup> and control mice at the age of 3 days (P3) (F) and 9 days (P9) (G).

**(I)** Immunoblot analysis of mTOR pathway components and activation in whole-liver lysate from three *Otulin*<sup>Δhep</sup> mice and three controls aged 3 days.

**(J)** Uncropped Ponceau S stained membrane from Figure 6I.



**Figure S7. Analysis of rapamycin-treated *Otulin*<sup>Δhep</sup> and control mice. Related to Figure 7.**

**(A)** Relative body weight for *Otulin*<sup>Δhep</sup> and control mice treated with rapamycin or vehicle as indicated. Each rapamycin-treated *Otulin*<sup>Δhep</sup> mouse is represented by an individual (cyan) line. The mean weights ( $\pm$ SEM) are shown for the other experimental groups. Data were pooled from two independent experiments.

**(B)** Relative liver weights from *Otulin*<sup>Δhep</sup> and control mice at the age of 6 weeks treated with rapamycin or vehicle as indicated. Each data point represents one mouse. Red bars indicate means. Data were analysed using the unpaired, two-sided Student's *t* test. n.s., non-significant.

**(C)** Representative micrographs of H&E stained liver sections from three vehicle-treated and three rapamycin-treated *Otulin*<sup>Δhep</sup> mice at the age of 6 weeks.

| Antibody                     | Catalog #  | Clone     | Supplier                              |
|------------------------------|------------|-----------|---------------------------------------|
| OTULIN                       | ab151117   |           | Abcam, Cambridge, UK                  |
| mouse HOIP                   | N/A        |           | Tokunaga et al., 2011                 |
| HOIL-1/RBCK1                 | MABC576    | 2E2       | Merck Millipore, Burlington, MA       |
| SHARPIN                      | 14626-1-AP |           | ProteinTech, Manchester, UK           |
| CYLD                         | 8462       | D1A10     | Cell Signaling Technology, Davers, MA |
| I $\kappa$ B $\alpha$        | 9242       |           | Cell Signaling Technology             |
| p65/RelA                     | 8242       | D14E12    | Cell Signaling Technology             |
| phospho-p65/RelA (S563)      | 3033       | 93H1      | Cell Signaling Technology             |
| ERK1/2                       | 4695       | 137F5     | Cell Signaling Technology             |
| phospho-ERK1/2 (T202/Y204)   | 4370       | D13.14.E4 | Cell Signaling Technology             |
| p38                          | ab31828    | M138      | Abcam                                 |
| phospho-p38 (T180/Y182)      | ab195049   | ERP18120  | Abcam                                 |
| Caspase-3                    | 14220      | D3R6Y     | Cell Signaling Technology             |
| cleaved Caspase-3 (D175)     | 9664       | 5A1E      | Cell Signaling Technology             |
| S6rp                         | 2217       | 5G10      | Cell Signaling Technology             |
| phospho-S6rp (S235/S236)     | 4858       | D57.2.2E  | Cell Signaling Technology             |
| TSC1/Hamartin                | 6935       | D43E2     | Cell Signaling Technology             |
| TSC2/Tuberin                 | 3990       | D57A9     | Cell Signaling Technology             |
| Rheb                         | 13879      | E1G1R     | Cell Signaling Technology             |
| mTOR                         | 2972       |           | Cell Signaling Technology             |
| phospho-mTOR (S2448)         | 2971       |           | Cell Signaling Technology             |
| CAD                          | 11933      |           | Cell Signaling Technology             |
| Phospho-CAD (S1859)          | 70307      | D5O6C     | Cell Signaling Technology             |
| Akt                          | 4691       | C67E7     | Cell Signaling Technology             |
| Phospho-Akt (S473)           | 4060       | D9E       | Cell Signaling Technology             |
| Ubiquitin                    | NB300-130  | Ubi-1     | Novus Biologicals, Littleton, CO      |
| linear ubiquitin (M1-polyUb) | MABS199    | 1E3       | Merck Millipore                       |
| Ki67                         | RM-9106-R7 | SP6       | Thermo Scientific, Waltham, MA        |
| anti-rabbit IgG HRP-coupled  | NA934      |           | GE Healthcare, Chicago, IL            |
| anti-mouse IgG HRP-coupled   | NXA931     |           | GE Healthcare                         |

**Table S1. Primary and secondary antibodies.** The target, catalog number, clone, and supplier for primary and secondary antibodies used in this study.

| Target                             | Forward primer                 | Reverse primer                |
|------------------------------------|--------------------------------|-------------------------------|
| <i>18S rRNA</i>                    | 5' -GTAACCCGTTGAACCCCAT-3'     | 5' -CCATCCAATCGGTAGTAGCG-3'   |
| <i>Tnf</i>                         | 5' -CCACCACGCTCTTCTGTCTAC-3'   | 5' -AGGGTCTGGGCCATAGAACT-3'   |
| <i>Il6</i>                         | 5' -TAGTCCTTCCTACCCCAATTTCC-3' | 5' -TTGGTCCTTAGCCACTCCTTC-3'  |
| <i>Il1b</i>                        | 5' -CAATGGACAGAATATCAAC-3'     | 5' -ACAGGACAGGTATAGATT-3'     |
| <i>Tnfaip3 (A20)</i>               | 5' -TTCCTCAGGACCAGGTCAGT-3'    | 5' -AAGCTCGTGGCTCTGAAAAC-3'   |
| <i>Cd68</i>                        | 5' -TGTCTGATCTTGCTAGGACCG-3'   | 5' -GAGAGTAACGGCCTTTTTGTGA-3' |
| <i>Acta2 (Smooth muscle actin)</i> | 5' -CCCCTGAAGAGCATCGGACA-3'    | 5' -TGGCGGGACATTGAAGGT-3'     |
| <i>Ccnd1 (Cyclin D1)</i>           | 5' -GCCGAGAAGTTGTGCATCTAC-3'   | 5' -GGAGAGGAAGTGTTCGATGAA-3'  |
| <i>Ctgf</i>                        | 5' -GCCCTAGCTGCCTACCGACT-3'    | 5' -GCCCATCCCACAGGTCTTAGA-3'  |
| <i>Gpc3</i>                        | 5' -CTGAGCCGGTGGTTAGCC-3'      | 5' -TCACTTTCACCATCCCGTCA-3'   |
| <i>Igf2</i>                        | 5' -ACATGCTGCCCAAGTAACC-3'     | 5' -CTGACAAAGATGGCCCATAG-3'   |
| <i>Afp</i>                         | 5' -CTCAGCGAGGAGAAATGGTC-3'    | 5' -GAGTTCACAGGGCTTGCTTC-3'   |
| <i>H19</i>                         | 5' -CAGGGCTAGTCCGCTCAA-3'      | 5' -AACAGACGGCTTCTACGACAA-3'  |
| <i>Klf4</i>                        | 5' -CGGACCACCTTGCCTTACACA-3'   | 5' -TGACTTGCTGGGAACCTTGACC-3' |
| <i>Aldh1 (Aldh17a)</i>             | 5' -GGTGAACATTGTCCCTGGTTAT-3'  | 5' -GACACTTTGTGCATGTCCATGT-3' |
| <i>Cd133 (Prom1)</i>               | 5' -TGGAGCTACCTGCGGTTTAGA-3'   | 5' -GGACCTGTGATTGCGATAATGA-3' |

**Table S2. Primer for RT-PCR sequences for RT-PCR.**
